# Supplementary material for: Fabrication of a high density graphene aerogel–gold nanostar hybrid and its application for the electrochemical detection of hydroquinone and o-dihydroxybenzene
Source: Royal Society of Chemistry journal article supplement (doi:10.1039/c5ra06196b), 2015-01-01
Supplement: c5ra06196b1.pdf [file c5ra06196b1.pdf]

## Supporting materials:

# Fabrication of high density graphene aerogel-gold nanostars hybrid and application for electrochemical detection of hydroquinone and o-dihydroxybenzene

Bei Hongxia,<sup>a</sup> Li Ruiyi,<sup>a</sup> Li Zaijun,<sup>\*a,b</sup> Liu Junkang,<sup>a</sup> Gu Zhiguo<sup>a</sup> and Wang Guangli<sup>a</sup>

<sup>a</sup> School of Chemical and Material Engineering, Jiangnan University, Wuxi, China

<sup>b</sup> Key Laboratory of Food Colloids and Biotechnology, Ministry of Education, Wuxi 214122, China

### Experimental detail

#### The resistance measurement

The resistance of graphene aerogel material was measured using a digital multimeter. For the measurement, two electrodes of the multimeter were inserted into the graphene aerogel and the distance between two electrodes keep at 1cm.

#### Maximum bearing weight measurement

The cylindrical graphene aerogel was vertically placed on the desktop. Then, put a beaker on top of the aerogel. Add dry quartz sand into the beaker until the aerogel appears an obvious deformation. Finally, mass of the sand added was weighted to calculate the maximum bearing weight.

#### Absorption spectra of the GNS solution

Absorption spectrum of the GNS solution was measured UV-2550 spectrometer (Shimadzu, Japan).

### Data analysis

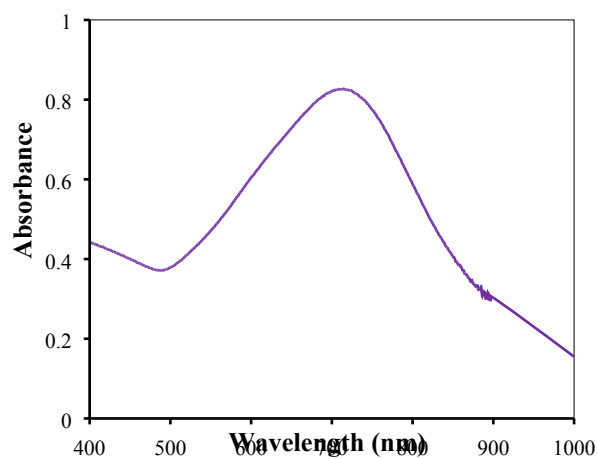

**Fig.s1** Absorption spectrum of the GNS solution

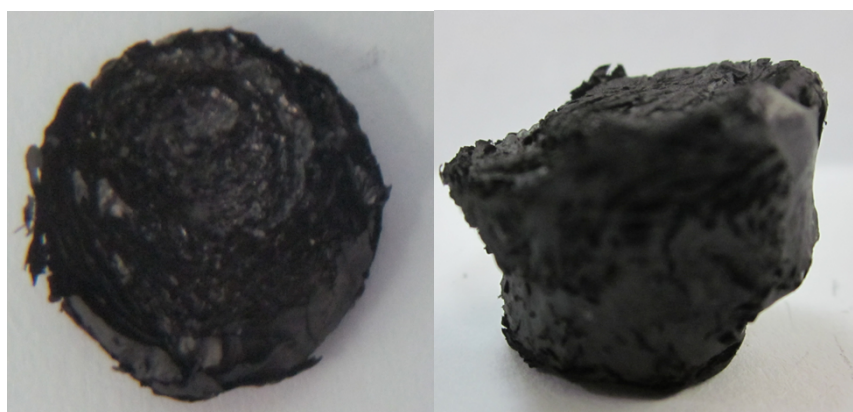

**Fig.s2** The optical photograph of graphene aerogel samples prepared using a relatively big volume of vial with (left) and without (right) picking hole.

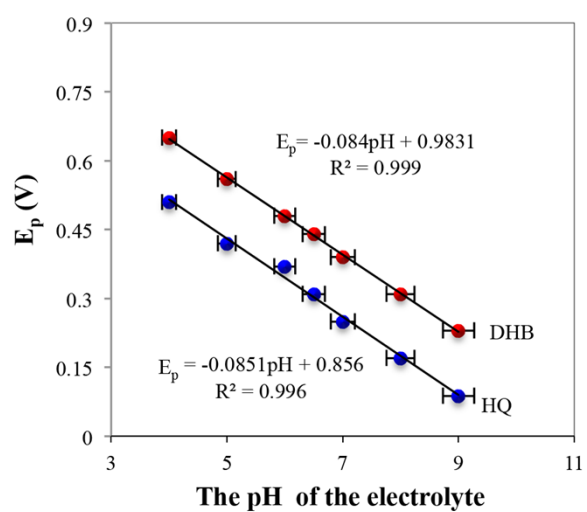

**Fig.s3** Influences of pH on the oxidation peak potentials. Scan rate:  $100 \text{ mV s}^{-1}$ ; The concentration of HQ and DHB:  $5 \times 10^{-4} \text{ M}$ .
